# Supplementary material for: Crystallization, thermal and mechanical properties of stereocomplexed poly(lactide) with flexible PLLA/PCL multiblock copolymer
Source: Royal Society of Chemistry journal article supplement (doi:10.1039/d2ra00461e), 2022-01-01
Supplement: d2ra00461e1.pdf [file d2ra00461e1.pdf]

**Crystallization, thermal and mechanical properties of  
stereocomplexed poly(lactide) with the flexible PLLA/PCL  
multiblock copolymer**

*Zhanxin Jing\**, Xiaolan Huang, Xinqi Liu, Mingneng Liao, Zhaoxia Zhang, Yong Li  
*Department of Applied Chemistry, College of Chemistry and Environment,  
Guangdong Ocean University, Zhanjiang, China*

**Supporting Information**

---

\* Corresponding author.

E-mail address: [jingzhan\\_xin@126.com](mailto:jingzhan_xin@126.com) (Zhanxin Jing).

**Table S1** Thermal parameters of sc-PLA and sc-PLA/MBC blends obtained from DSC

| Samples        | Cooling    |                  | Reheating |          |                 |            |                   |            |                   |
|----------------|------------|------------------|-----------|----------|-----------------|------------|-------------------|------------|-------------------|
|                | $T_{c,sc}$ | $\Delta H_{c,s}$ | $T_g$     | $T_{cc}$ | $\Delta H_{cc}$ | $T_{m,hc}$ | $\Delta H_{m,hc}$ | $T_{m,sc}$ | $\Delta H_{m,sc}$ |
| sc-PLA         | 125.2      | 29.0             | 58.5      | 113.9    | 1.4             | 167.3      | 1.6               | 210.4      | 28.0              |
| sc-PLA/MBC-5%  | 117.1      | 36.6             | 52.8      | —        | —               | —          | —                 | 206.2      | 34.2              |
| sc-PLA/MBC-10% | 104.1      | 22.0             | 51.7      | 87.3     | 4.3             | —          | —                 | 197.3      | 28.0              |
| sc-PLA/MBC-15% | 95.2       | 0.42             | 51.3      | 97.1     | 20.3            | —          | —                 | 185.2      | 24.9              |
| sc-PLA/MBC-20% | 116.2      | 7.5              | 52.0      | 85.0     | 13.0            | —          | —                 | 189.0      | 25.0              |
| sc-PLA/MBC0.9  | 99.8       | 16.7             | 52.1      | 81.6     | 2.8             | —          | —                 | 193.7      | 25.0              |
| sc-PLA/MBC5.0  | 118.5      | 37.2             | 52.4      | —        | —               | —          | —                 | 208.4      | 31.1              |

Notes:  $T_{c,sc}$  (°C) and  $\Delta H_{c,sc}$  (J/g) denote the stereocomplex-crystallization temperature and the corresponding enthalpy in the cooling run;  $T_g$  (°C) is the glass transition temperature;  $T_{cc}$  (°C) and  $\Delta H_{cc}$  (J/g) are the cold-crystallization temperature and the corresponding enthalpy in the reheating run;  $T_{m,hc}$  (°C) and  $T_{m,sc}$  (°C) are melting temperatures of homo-crystallization crystallites and stereocomplex-crystallization crystallites, respectively;  $\Delta H_{m,hc}$  (J/g) and  $\Delta H_{m,sc}$  (J/g) are melting enthalpies of homo-crystallization crystallites and stereocomplex-crystallization crystallites, respectively.

**Table S2** TGA parameters of sc-PLA and sc-PLA/MBC blends

| <b>Sample</b>         | <b><math>T_{5wt\%}</math> (°C)</b> | <b><math>T_{50wt\%}</math> (°C)</b> | <b><math>T_d</math> (°C)</b> |
|-----------------------|------------------------------------|-------------------------------------|------------------------------|
| <b>sc-PLA</b>         | 261.5                              | 294.8                               | 296.0                        |
| <b>sc-PLA/MBC-5%</b>  | 258.0                              | 293.5                               | 298.1                        |
| <b>sc-PLA/MBC-10%</b> | 249.7                              | 273.4                               | 275.6                        |
| <b>sc-PLA/MBC-15%</b> | 248.2                              | 270.6                               | 271.3                        |
| <b>sc-PLA/MBC-20%</b> | 248.7                              | 271.2                               | 271.0                        |
| <b>sc-PLA/MBC0.9</b>  | 246.7                              | 268.5                               | 267.9                        |
| <b>sc-PLA/MBC5.0</b>  | 253.8                              | 276.8                               | 277.4                        |

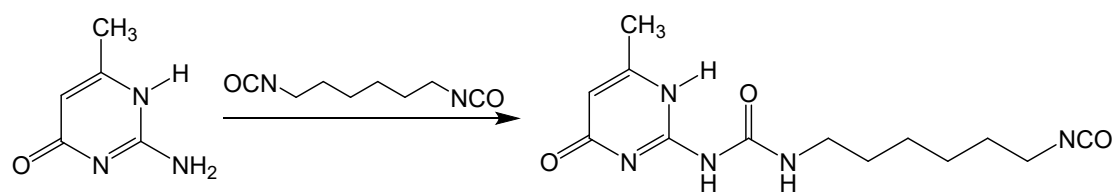

**Figure S1** The synthetic route of UPy-NCO

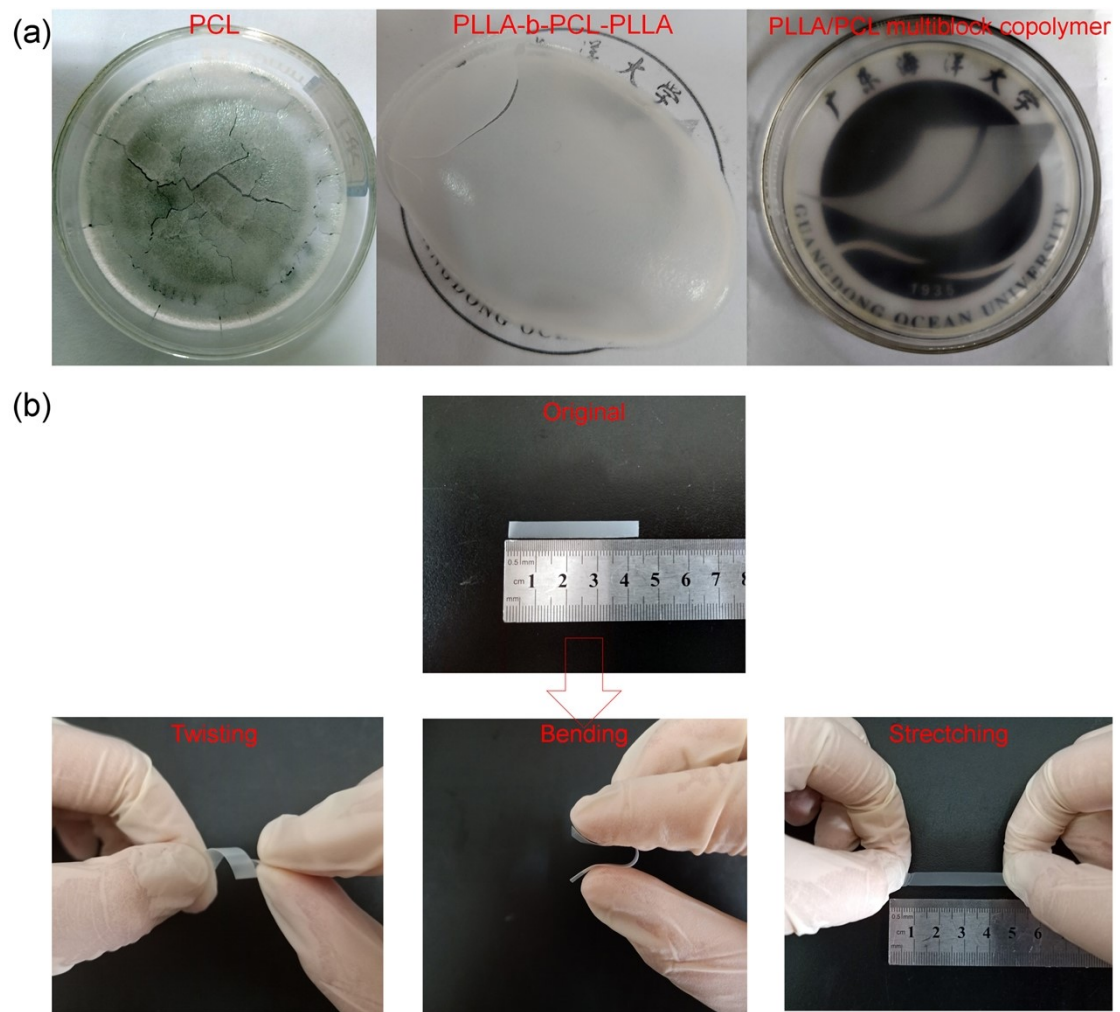

**Figure S2** (a) Optical photographs of PCL, PLLA-b-PCL-b-PLLA and PLLA/PCL multiblock copolymer; (b) the twisting, bending and stretching shapes of PLLA/PCL multiblock copolymer

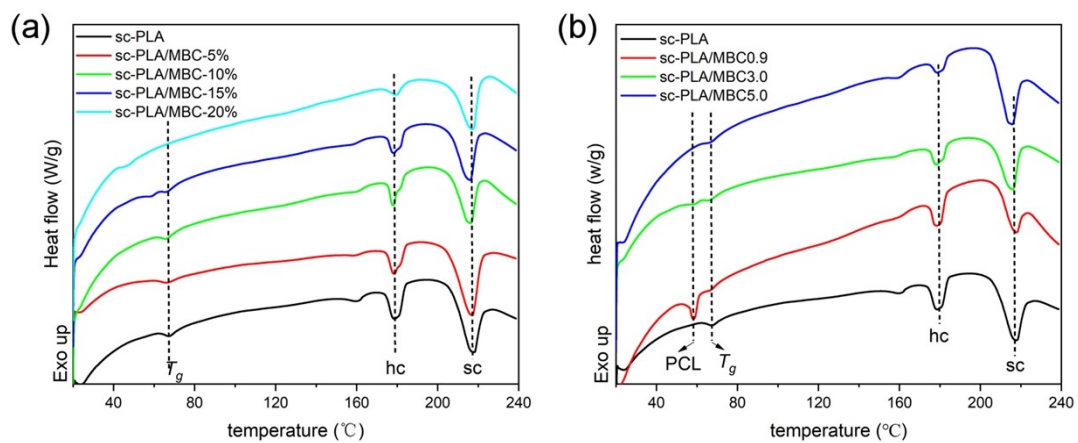

**Figure S3** DSC first heating curves of sc-PLA/MBC blends: (a) the blends with various MBC contents; (b) the blends with different MBC

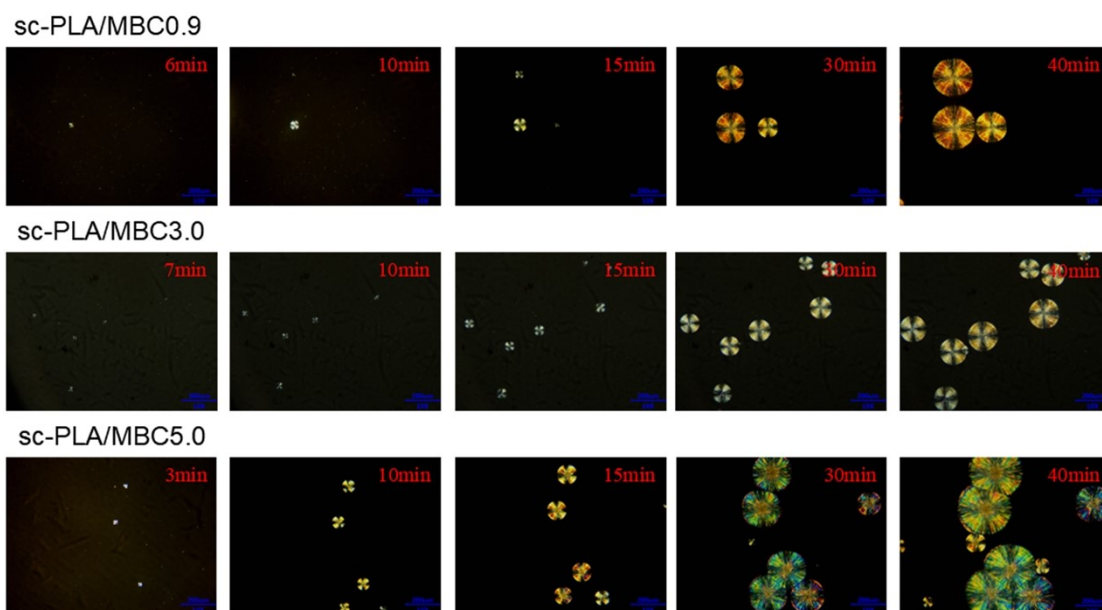

**Figure S4** POM photos of sc-PLA/MBC blends with different MBC during isothermal crystallization of 180 °C
